# Supplementary material
Source: HighWire-hosted journal article supplement (doi:10.1101/rna.079190.122)
Supplement: Supplemental_Information.docx [file Supplemental_Information.docx]

Supplementary Information for

**RNA:RNA Interaction in Ternary Complexes Resolved by Chemical Probing**

Elnaz Banijamali1, Lorenzo Baronti1,2, Walter Becker1, Joanna J. Sajkowska-Kozielewicz1, Ting Huang1, Christina Palka3, David Kosek4, Lara Sweetapple1, Juliane Müller1, Michael D. Stone3, Emma R. Andersson4, Katja Petzold1,5

1Department of Medical Biochemistry and Biophysics, Karolinska Institute, Biomedicum 9B, Solnavägen 9, 17177 Stockholm, Sweden

2Present address: Institute of Structural Biology, Helmholtz Zentrum München, Neuherberg, Germany

3Department of Chemistry and Biochemistry, University of California, Santa Cruz, California 95064, USA

4Department of Cell and Molecular Biology, Karolinska Institutet, Biomedicum 9B, Solnavägen 9, 17177 Stockholm, Sweden

5Stellenbosch Institute for Advanced Study (STIAS), Wallenberg Research Centre at Stellenbosch University, Stellenbosch 7600, South Africa

Table of Contents

[Supplementary Figures 2](#_Toc115863837)

[Figure S1. Design of the main loop scaffold sequence 2](#_Toc115863838)

[Figure S2. Sequential cytosines SHAPE reactivity and sugar pucker analysis by NMR 3](#_Toc115863839)

[Figure S3. Titration of mSIRT1:miR-34a (RNA:RNA) using the trans-scaffold 5](#_Toc115863840)

[Figure S4. Quantification of AGO2 loading with miR-34a 7](#_Toc115863841)

[Figure S5. Effect of proteinase K treatment on signal intensity of CE profiles 8](#_Toc115863842)

[Figure S6. Signal reduction due to addition of AGO2. 9](#_Toc115863843)

[Figure S7. Titration of mSIRT1:miR-34a-AGO2 (RNA:RNA-RBP) using the trans-scaffold 10](#_Toc115863844)

[Figure S8. Comparison between DMSO or ddH2O in control reactions 11](#_Toc115863845)

[Figure S9. SHAPE for miR-34a in trans-scaffold 12](#_Toc115863846)

[Figure S10. Scrm-seed in cis-scaffold with conformational switch 13](#_Toc115863847)

[Figure S11. Raw data for scrambled (scrm) sequence 15](#_Toc115863848)

[Figure S12. Raw data for mSIRT1 trans-scaffold 16](#_Toc115863849)

[Figure S13. Raw data for scrambled seed (scrm-seed) sequence 17](#_Toc115863850)

[Supplementary Tables 18](#_Toc115863851)

[Table S1 18](#_Toc115863852)

[Table S2 19](#_Toc115863853)

[Table S3 20](#_Toc115863854)

[Table S4 21](#_Toc115863855)

[Table S5 22](#_Toc115863856)

[Table S6 23](#_Toc115863857)

[Table S7 24](#_Toc115863858)

[Table S8 25](#_Toc115863859)

[Table S9 26](#_Toc115863860)

[Table S10 27](#_Toc115863861)

[Table S11 28](#_Toc115863862)

[Reference 29](#_Toc115863863)

# Supplementary Figures

**
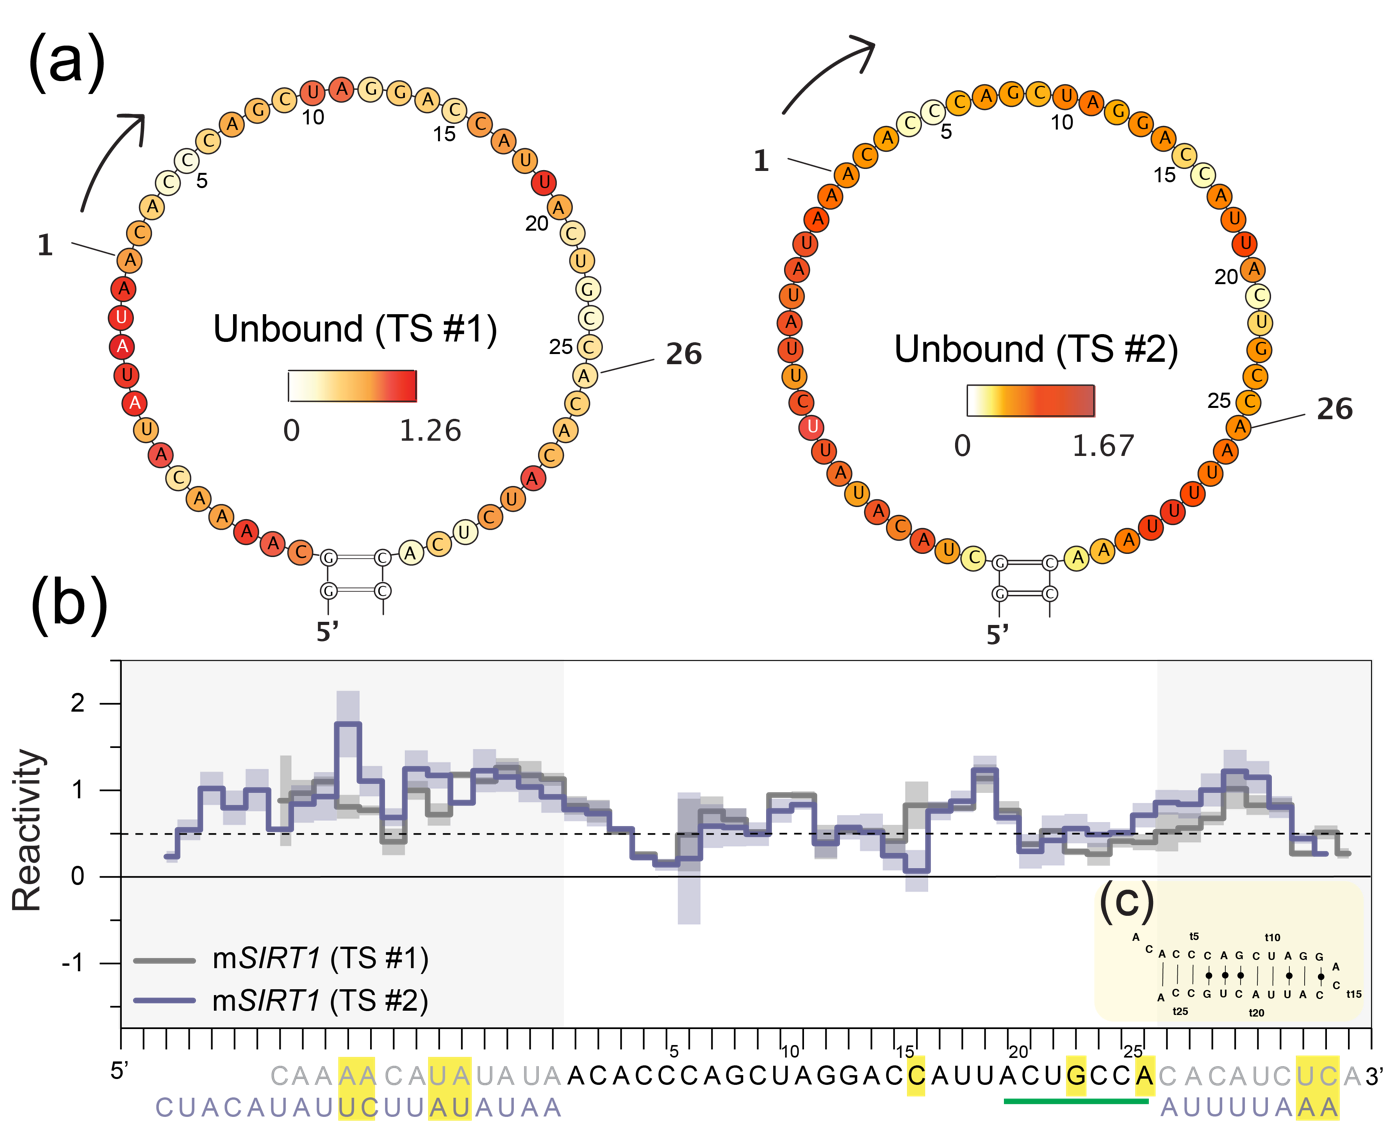
**

Figure S1. Design of the main loop scaffold sequence**.** Panel (a) shows the predicted folding state of the main loop in Trans-Scaffold #1 (TS#1) and Trans-Scaffold #2 (TS#2) using MC-Fold (Parisien and Major, 2008). The first and last nucleotide in the target m*SIRT1* sequence is indicated by numbers. For each heatmap, the reactivity range is shown in the center of the loop, white for zero reactivity, red for highest possible reactivity. In panel (b) the averaged reactivity values over two independent replicates of the nucleotides in the main loop are shown, with one standard deviation indicated by shaded boxes. The buffer nucleotides in TS#1 and TS#2 are indicated in gray and m*SIRT1* sequence is shown with black letters. Nucleotides that show different (outside of their errors) reactivity values for the two scaffolds are highlighted in yellow. In panel (c) the predicted structure folding with the lowest free energy of m*SIRT1* sequence (by MC-Fold (Parisien and Major, 2008)) is presented. Both scaffolds appear suitable for further experiments, as no secondary structure with the buffer region or within the target sequence is apparent. TS#1 was selected as somewhat lower artifacts appeared in the targeting sequence.


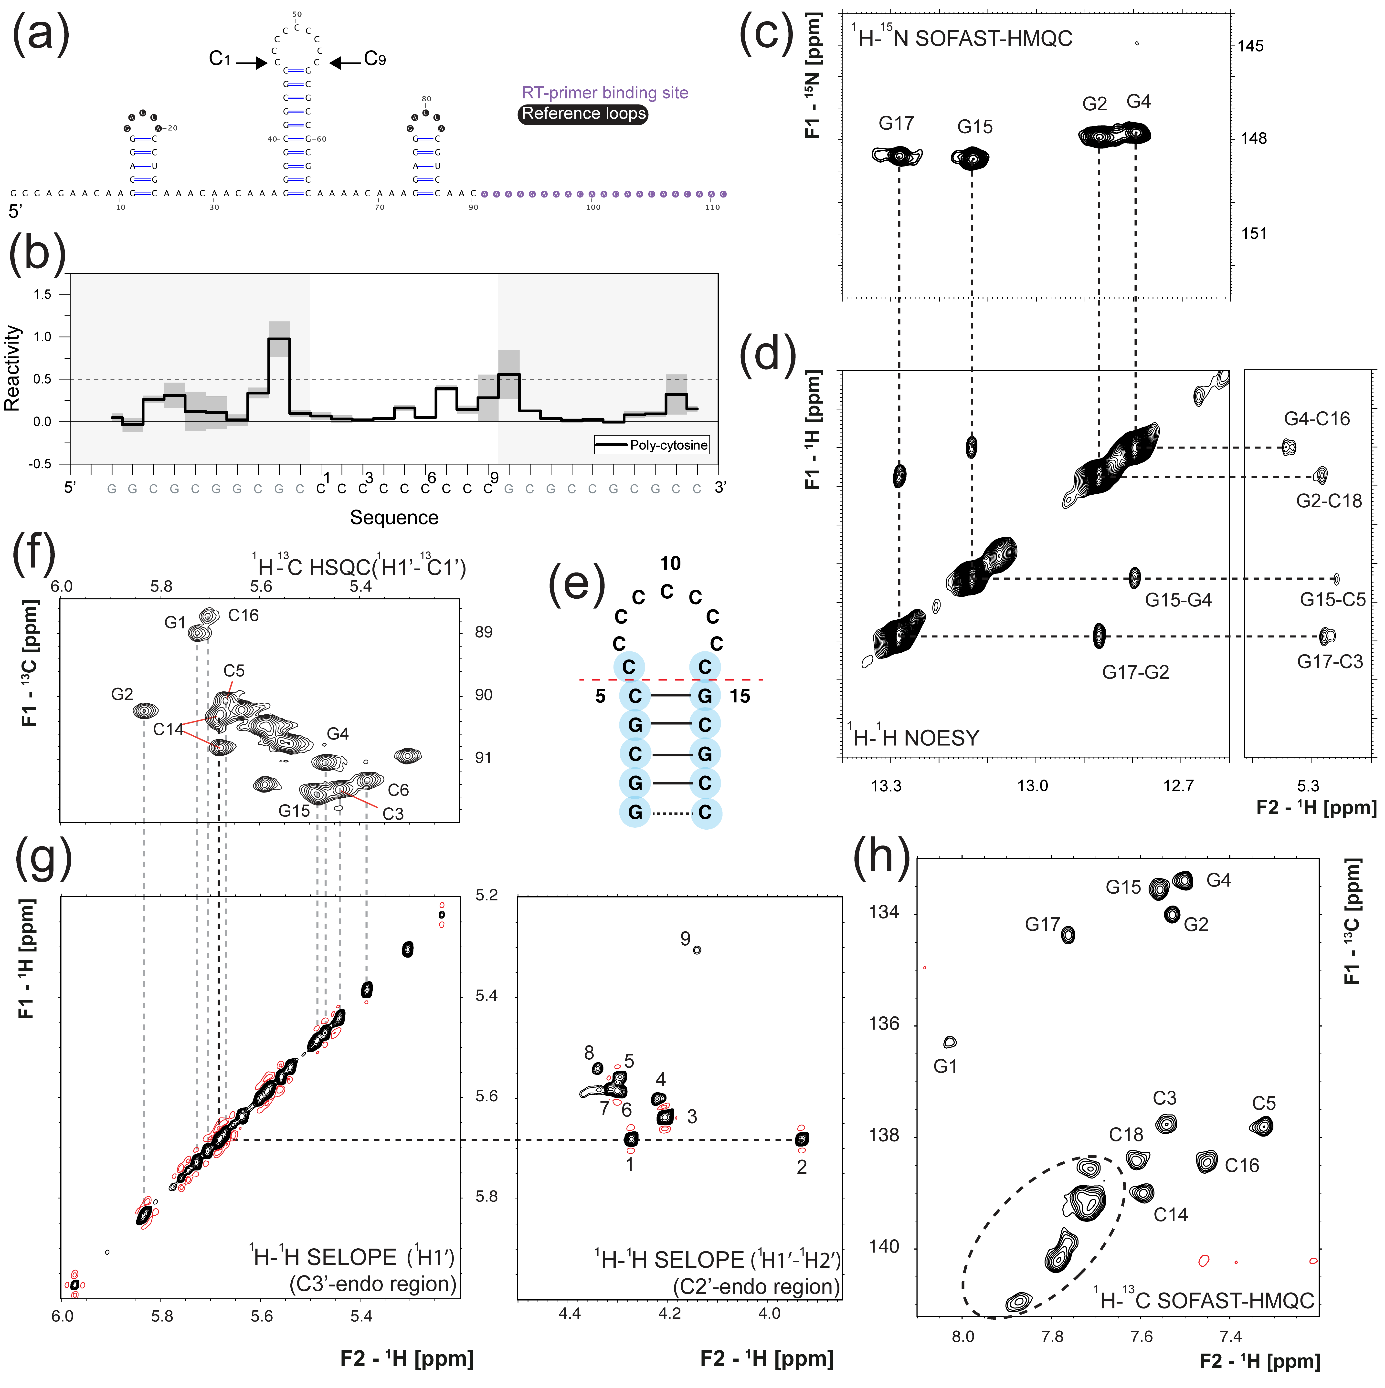


Figure S2. Sequential cytosines SHAPE reactivity and sugar pucker analysis by NMR**.** (a) Designed scaffold containing nine cytosines in the middle hairpin structure (first and last nucleotides indicated with arrows). The two reference loops and sequence complementary to the reverse transcription (RT) primer are shown in white letters and identified with black and purple circles, respectively. (b) Shows the averaged reactivity values of three independent replicates, with shading representing one standard deviation and shown as plus and minus error. All but the last cytosine in the loop (C9) shows reactivity values ≤0.5, indicating base-paired nucleotides. (c) and (d) 1H-1H NOESY (mixing time of 175 ms) and 1H-15N SOFAST-HMQC (Schanda and Brutscher, 2005) spectra of the same design of sequential cytosines (e). The imino walk based on the 1H-15N SOFAST-HMQC (indicated with dashed lines), and the sequential walk in 1H-1H NOESY spectrum confirm the correct folding of the stem helix carrying the poly cytosine loop. However, chemical shift overlap precluded assignment of most of the cytosines in the loop (assigned nucleotides are indicated with blue circles in (e)). The NMR sample was prepared by large scale IVT (200 mM Tris-Cl pH 8.0, 10 mM MgCl2, 10 mM dithiothreitol (DTT), 25 mM spermidine, 5 mM GMP, 3 mM NTPs, 0.3 mg/mL T7 polymerase (in house), 0.1 mg/mL iPPase (in house), 3.6 ng/mL of DNA template (IDT), 20% DMSO v/v, in total volume of 10 mL; incubated overnight at 37°C) and purified with IE-HPLC (following the protocol explained in the Material and methods section). The sample was exchanged into NMR buffer (15 mM sodium phosphate, 0.1 mM EDTA, 25 mM NaCl, at pH 6.5) with final concentration of 1.6 mM. (f) and (g) 1H-13C HSQC (Vuister and Bax, 1992) and 1H-1H SELOPE (Schlagnitweit *et al.*, 2018) spectra of the anomeric region, respectively, used to indicate the sugar puckering. All NMR experiments were acquired using a Bruker AVANCE III 600 NMR spectrometer with cryogenic QCI probe, at 298 K. In the SELOPE spectrum the H1’ of the C3’-endo conformations appear along the diagonal (left box: C3’-endo region), and in C2’-endo conformations H1’-H2’ cross peaks appear as well (right box: C2’-endo region)(Schlagnitweit *et al.*, 2018). (h) 1H-13C SOFAST-HMQC of the aromatic region (i.e. cross peaks of H6/8 with C6/8 of cytosines/guanosines). Based on the SELOPE spectrum, there are nine nucleotides with C2’-endo conformation (right box (g)), one of which is C14 (either peak #1 or #2) in the loop. The eight remaining H1’-H2’ cross peaks, which have both C2’ and C3’-endo contributions, indicating their flexible environment, most likely belong to the cytosines of the loop (C7 till C13) and the last nucleotide of this construct, C19. G17 and C18, although the H1’ are not assigned, are less likely to be these nucleotides, because nucleotides in helical region rarely experience a C2’-endo sugar pucker (Clay *et al.*, 2017). On the other hand, the observed C6 chemical shift of the cytosines in the loop (peaks circled with dashed line in (h)) are in the range as nucleotides in loop conformation. SHAPE data indicates a reduced flexibility for the poly-C loop, typically assumed to be caused by base-pairing, which arrests the sugar pucker in a pure C3’-endo confirmation (as visible for the helical stem in (g) left panel). However, NMR data indicates flexibility of these nucleotides at least based on the sugar pucker, as both C2’- and C3-endo conformations are observed. Therefore, we conclude that SHAPE experiences an unexplained sequence dependent bias of sequential cytosines.


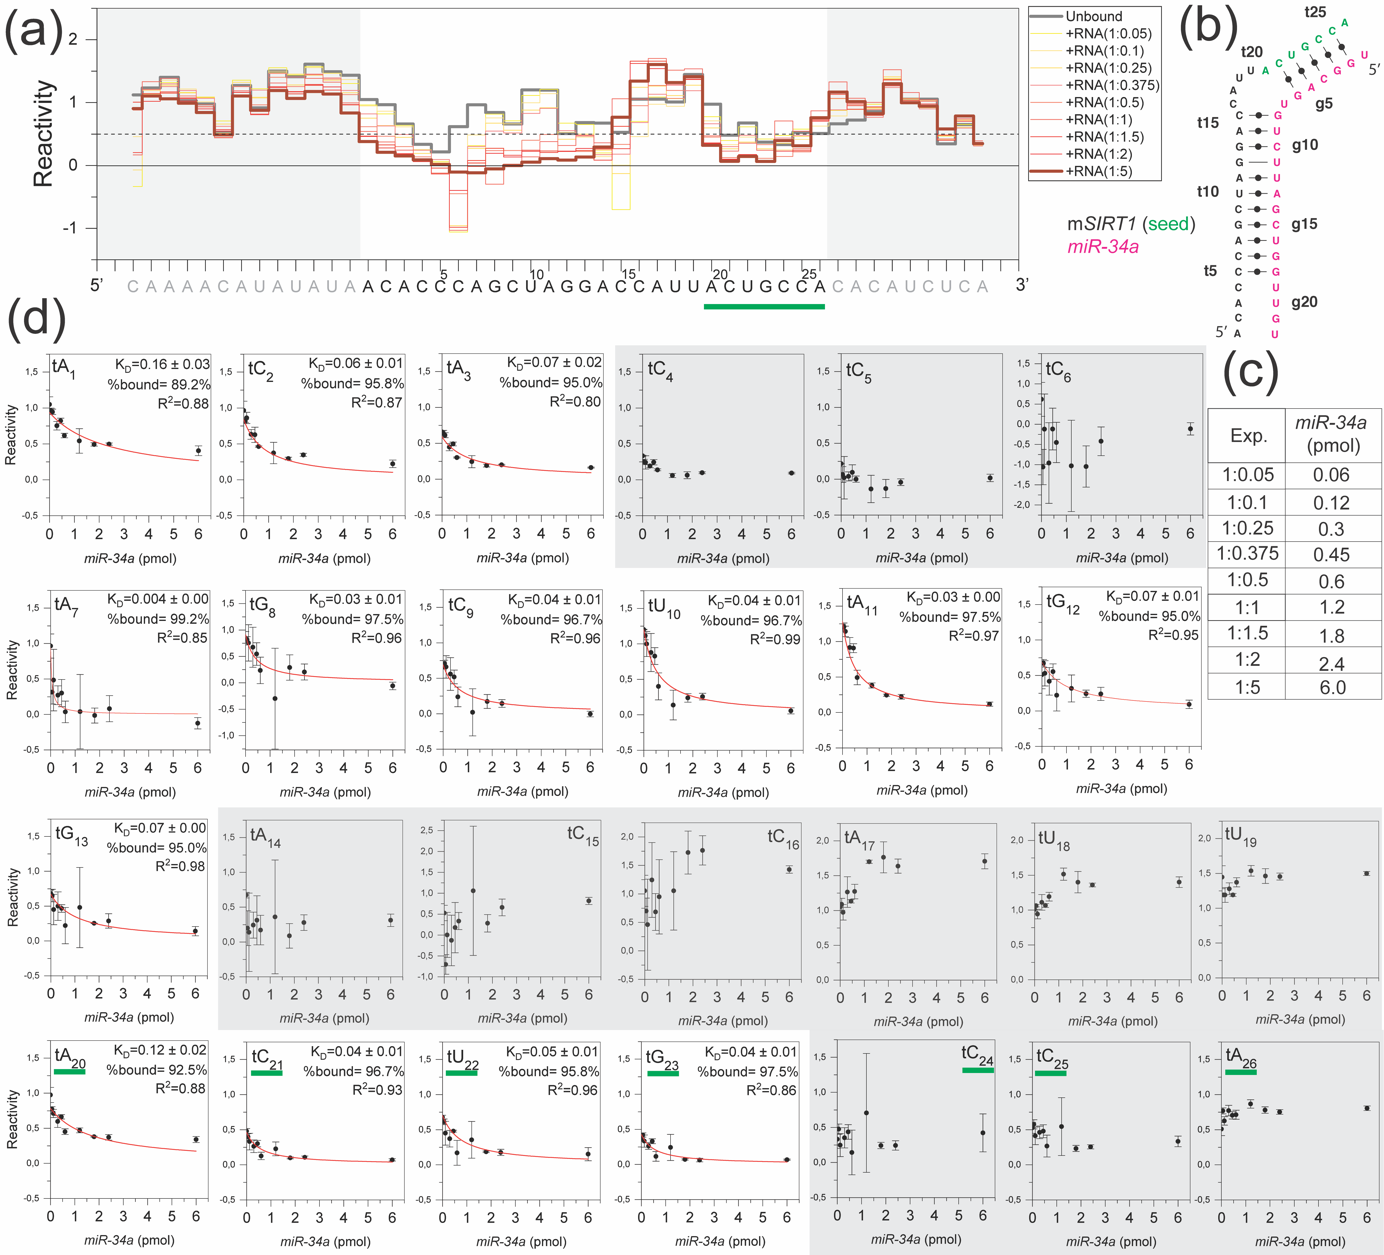


Figure S3. Titration of m*SIRT1*:*miR-34a* (RNA:RNA) using the trans-scaffold**.** (a)SHAPE re-normalized reactivity values (average of three independent replicates) of increasing *miR-34a* concentrations (1:0 to 1:5 ratio of m*SIRT1*:*miR-34a*). Error bars are omitted to reduce the overlap (complete data available in our GitHub repository; see data availability section). (b) m*SIRT1*:*miR-34a* secondary structure determined by NMR (Baronti *et al.*, 2020). (c) Table of [*miR-34a*] in pmol for each titration point. (d) SHAPE monitored titration displayed for each individual nucleotide of m*SIRT1* (re-normalized reactivities of an average of three independent experiments, error bars equal to one standard deviation). Each curve was fitted using modified form of Michaelis-Menten equation (), to extract KD (shown in μM) and the percentage base-paired at a 1:2 ratio (m*SIRT1*:*miR-34a*). Fits were only performed on nucleotides that showed a pronounced binding event (to reliably fit binding), excluding tC4-tC6, end nucleotides and the bulge region (gray background). Seed nucleotides are highlighted with green lines in (a) and (d). Interestingly, for bulge nucleotide (tC16 to tU19) we see an increase in reactivity values upon complex formation between m*SIRT1* and *miR-34a*, indicating a possible more pronounced formation of a bulge/unpaired region. As expected from end-fraying, we do not observe any changes in reactivity values for tA26, however, for tA1 the reactivity value slightly changes by increasing the amount of *miR-34a* per reaction.


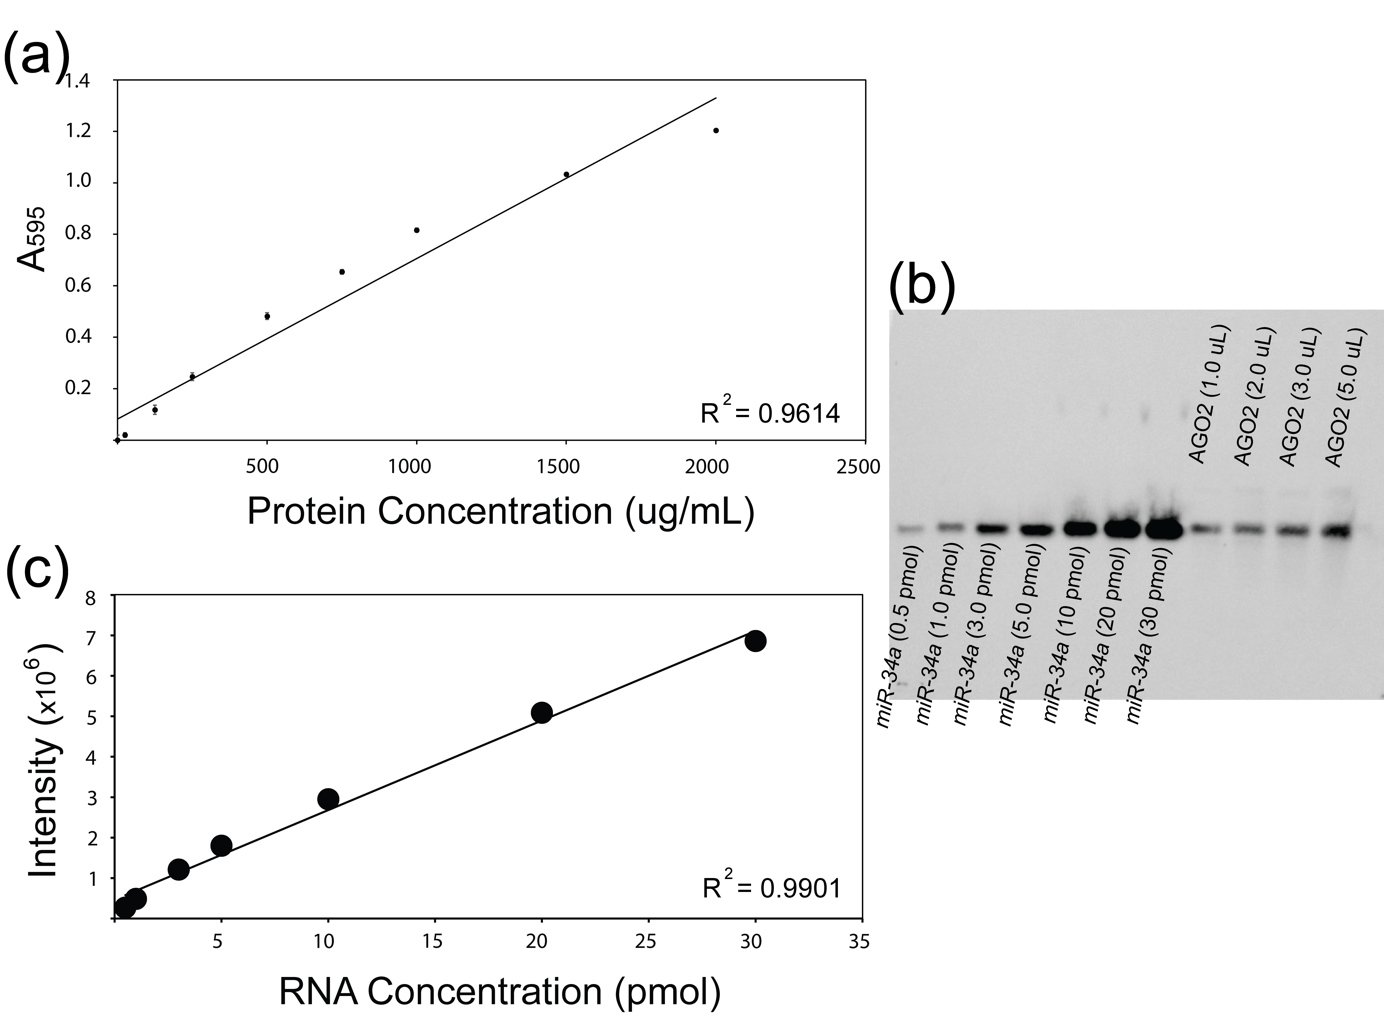


Figure S4. Quantification of AGO2 loading with *miR-34a***.** Panel (a) shows the results of Bradford assay of AGO2 after size exclusion chromatography (SEC). The estimated protein concentration is ~16 µM (Vtotal ≅2 mL), technical duplicates were performed. Panel (b) shows the result of northern blot of AGO2 after re-loading with *miR-34a*, based on protocol described in (Baronti *et al.*, 2020), to estimate the miR-loading efficiency. For probing, 5’-Cy3-labelled complementary sequence to *miR-34a* was used. The left seven lanes showing a standard curve of increasing amounts of pure *miR-34a*, plotted in panel (c). The right four lanes show a dilution series of *miR-34a*-loaded AGO2 after SEC purification. Estimation of the loading from intensities (calculated with Image Lab software 6.1 (Bio-Rad Laboratories, Inc)) of AGO2 with *miR-34a* is ~5%.

**
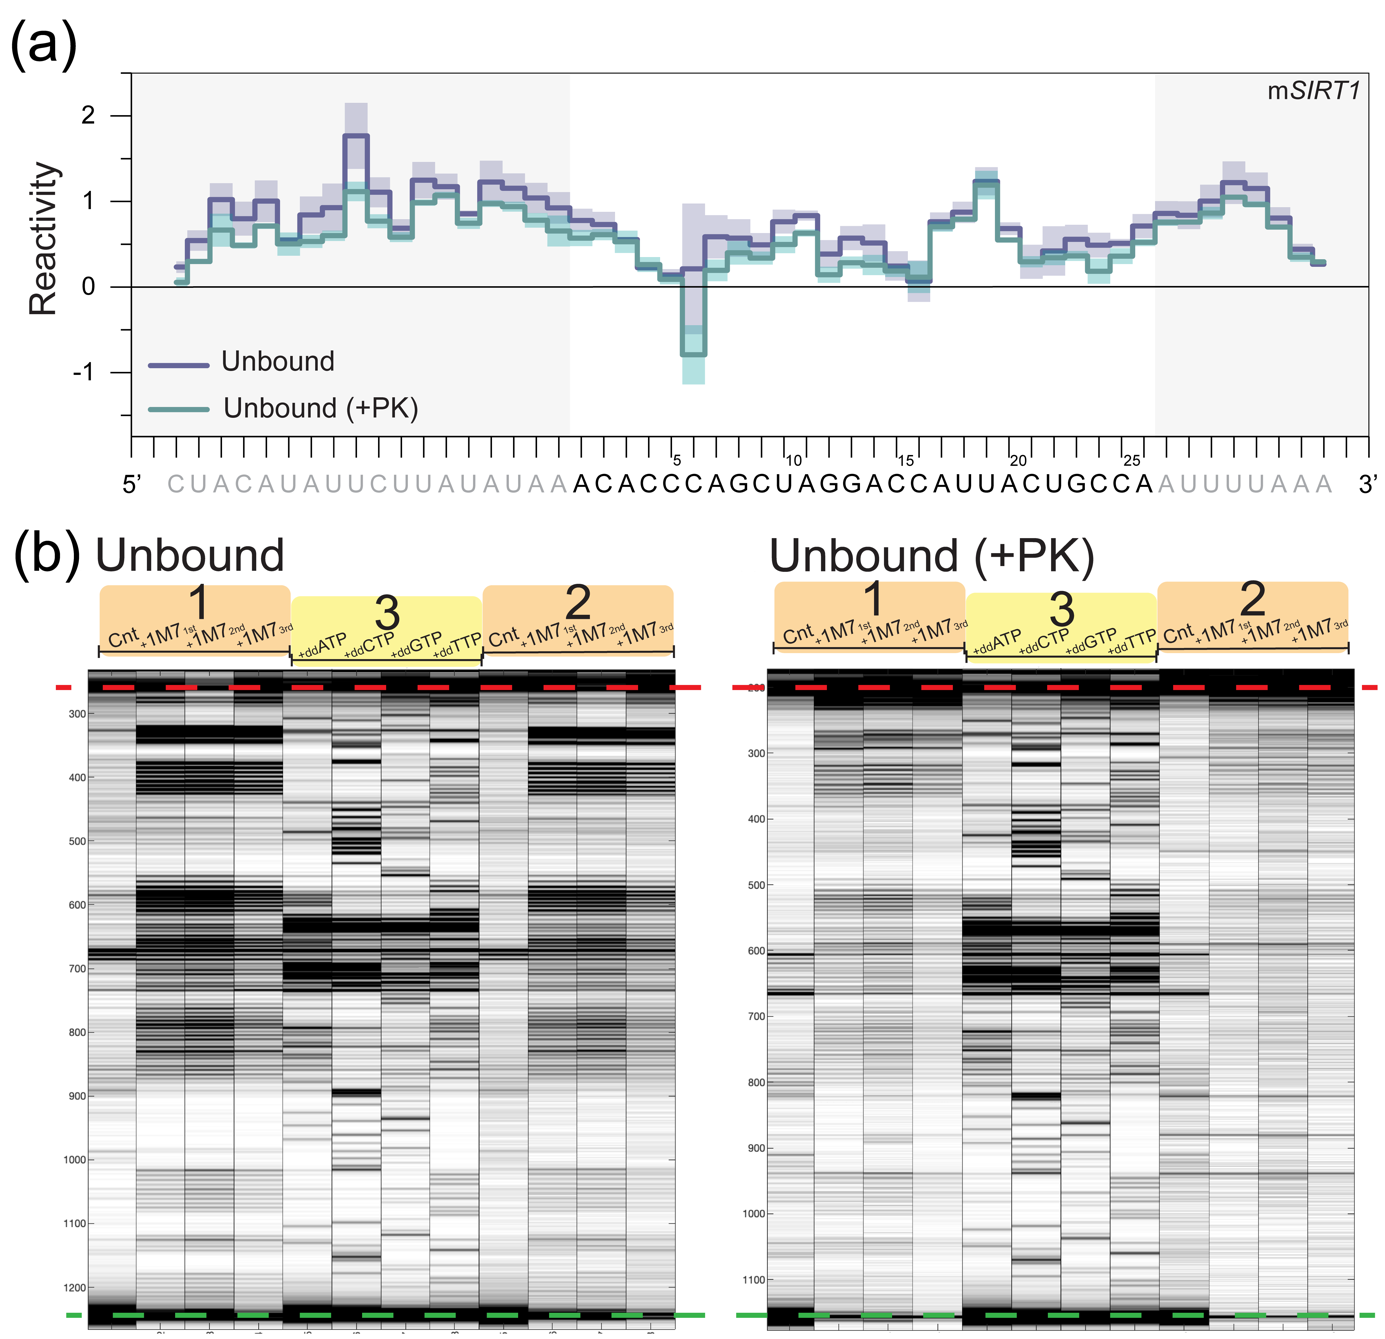
**

Figure S5. Effect of proteinase K treatment on signal intensity of CE profiles**.** (a) averaged values of three and four independent replicates of m*SIRT1* targeting sequence in unbound trans-scaffold TS#2, with and without the additional step of proteinase K treatment (+PK). The buffer nucleotides in the main loop are indicated with gray, and m*SIRT1* sequence in black letters. Z-factor evaluation is presented in Table S4. (b) CE profiles of unbound m*SIRT1* with and without proteinase K treatment are shown. The dashed lines at the top (red) and bottom (green) show the unextended RT-primer and full-length cDNA, respectively. CE traces #1 and #2 present chemical probing for m*SIRT1*, with the first lane being a control. CE traces #1 show saturated condition (diluted 1:4 with 350 ROX size standard and Hi-Di Formamide) and CE traces #2 are diluted (diluted 1:14 with 350 ROX size standard and Hi-Di Formamide). CE traces #3 show the Sanger sequencing ladders. It becomes visible, that the signal intensities reduce when proteinase K treatment (Unbound (+PK)) is used, due to the lower efficiency of RNA recovery.

**
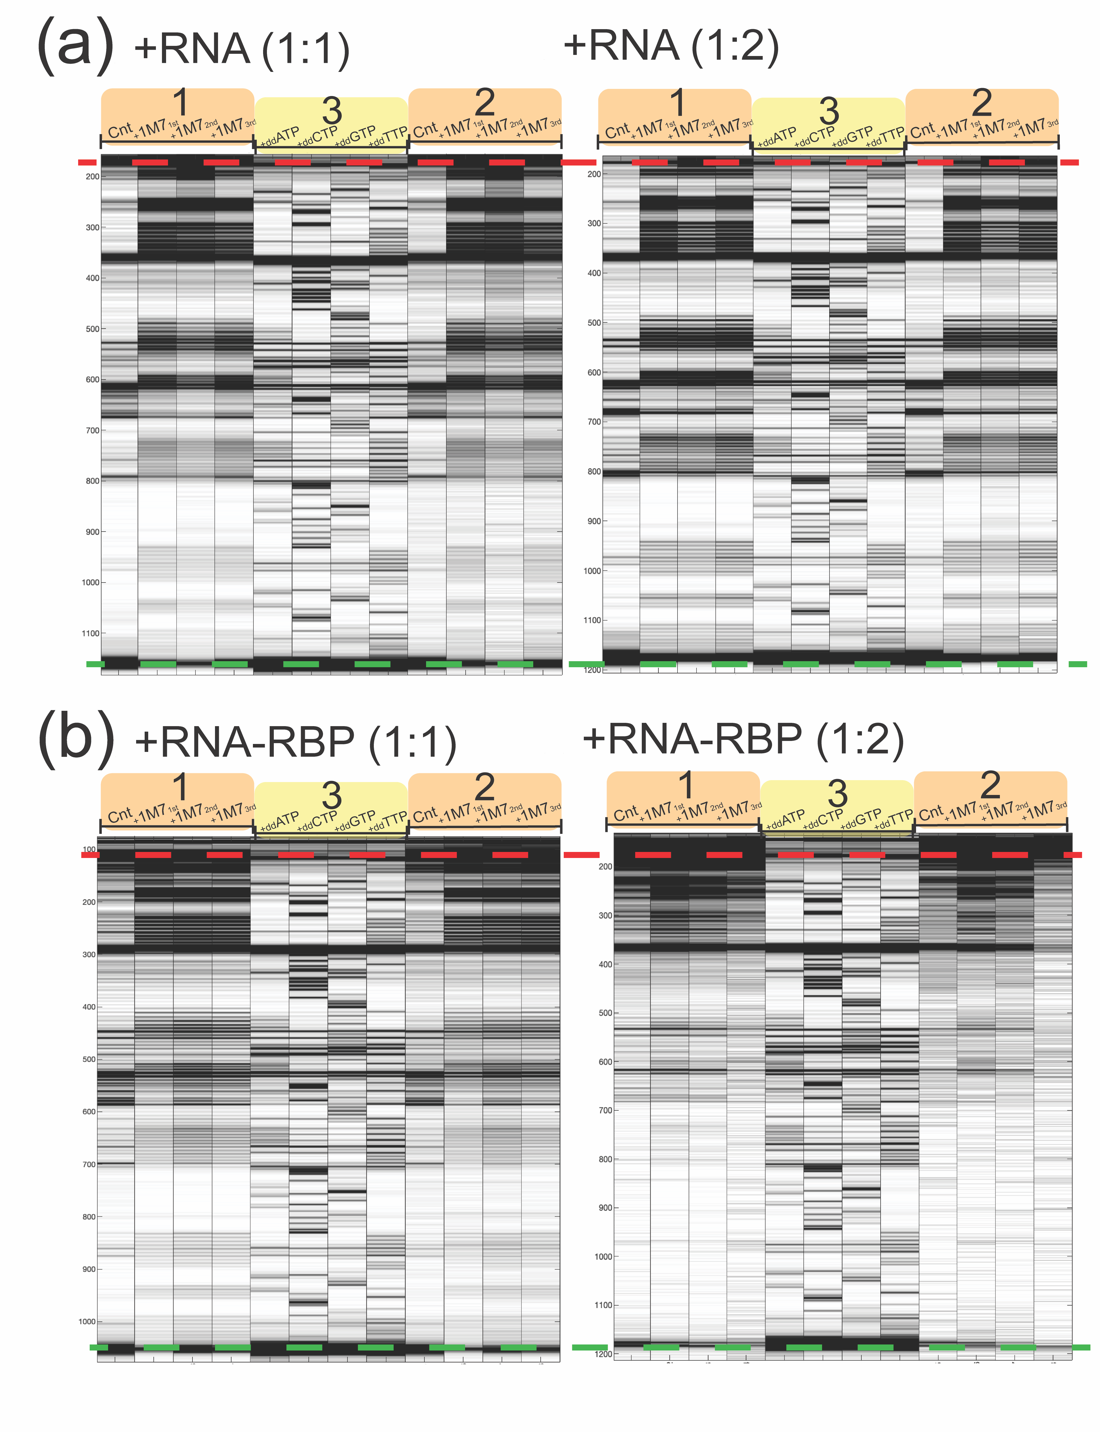
**

Figure S6. Signal reduction due to addition of AGO2.(a) and (b) present exemplary CE profiles of one independent experiments for RNA:RNA and RNA:RNA-RBP binding (the complete data can be found on our GitHub). Dashed lines at the top (red) and bottom (green) of the CE profiles are roughly indicating the position of unextended RT-primer and the full-length cDNA product, respectively. Trace descriptions are as in Figure S5. By comparing the CE profiles, we observe that increasing the amount of protein (*miR-34a*-AGO2) leads to a decrease in final signal intensity, while increasing the amount of free *miR-34a* does not affect the signal intensity, but increases the reproducibility by increasing the signal to noise ratio.

**
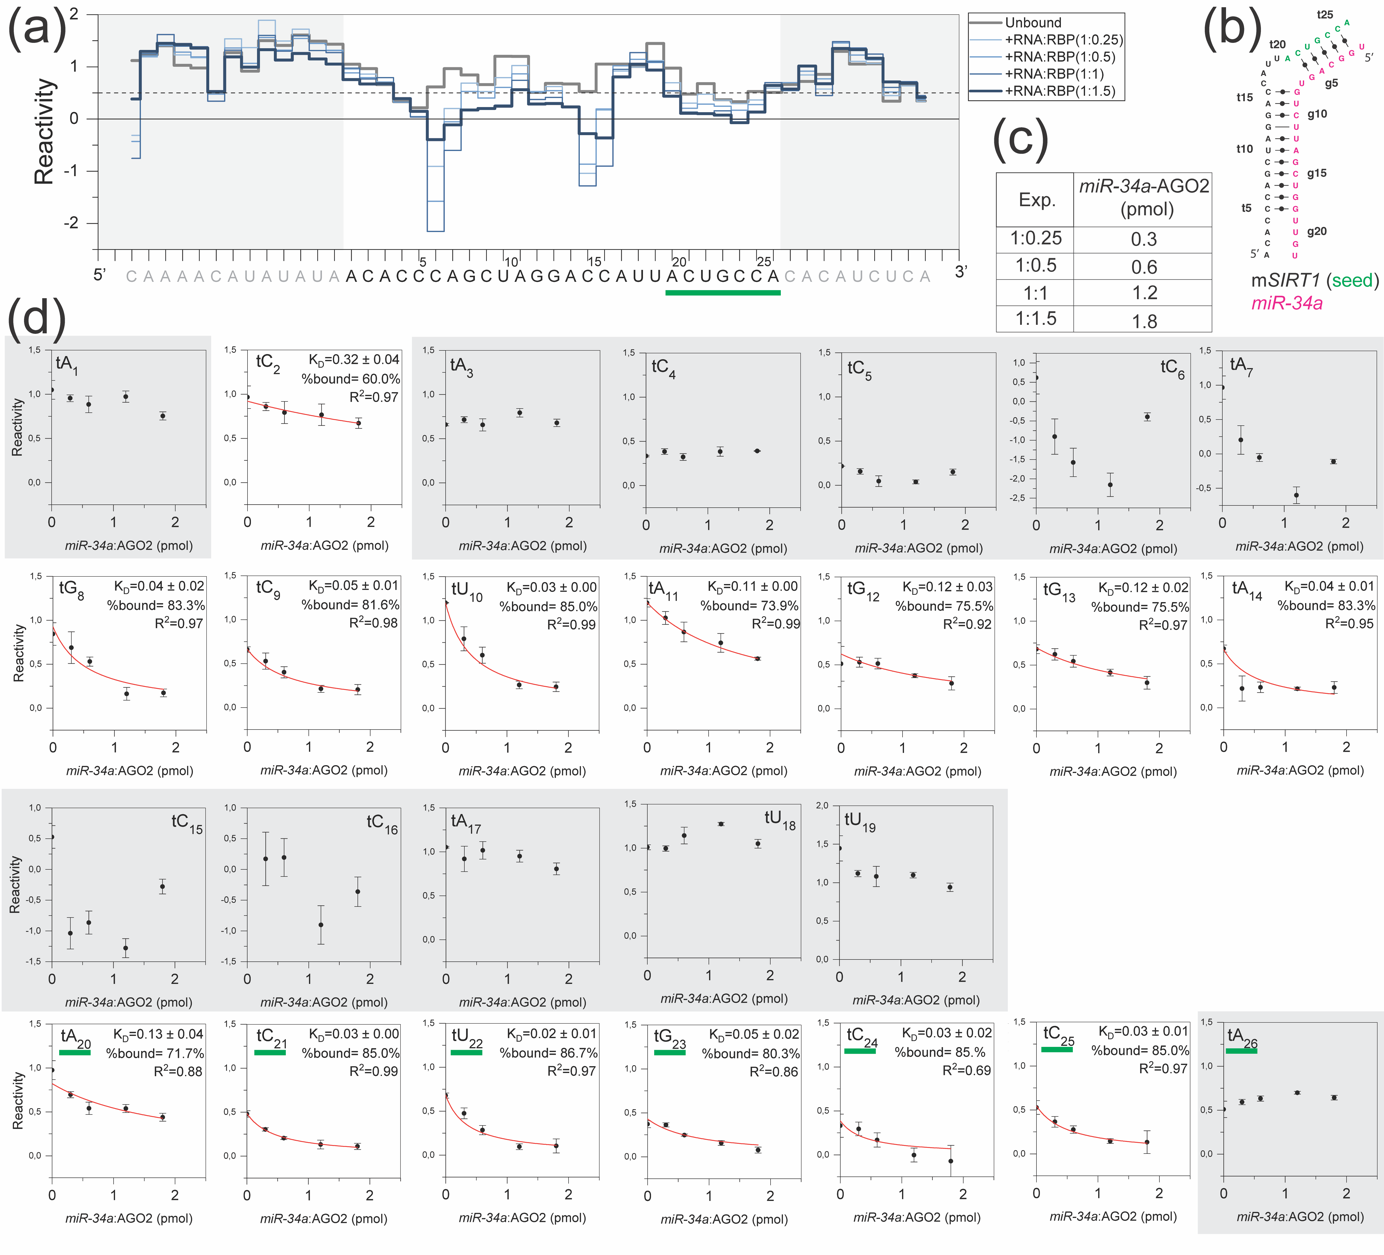
**

Figure S7. Titration of m*SIRT1*:*miR-34a*-AGO2 (RNA:RNA-RBP) using the trans-scaffold**.** (a)SHAPE re-normalized reactivity values (average of three independent replicates) of increasing *miR-34a*-AGO2 concentration (1:1.5 ratio between m*SIRT1*:*miR-34a*-AGO2). Error bars are omitted to reduce the overlap (complete data available in our GitHub repository; see data availability section). (b) m*SIRT1*:*miR-34a* secondary structure determined by NMR (Baronti *et al.*, 2020). (c) Table of [*miR-34a*] in pmol for each titration point (d) SHAPE monitored titration displayed for each individual nucleotide of m*SIRT1* (re-normalized reactivities of an average of three independent experiments, error bars equal to one standard deviation). KD values are calculated as in Figure S3. Fits were only performed on nucleotides that showed a pronounced binding event (to reliably fit binding), excluding tA3-tA7, end nucleotides and the bulge region (charts with gray backgrounds). Seed nucleotides are highlighted with green lines in (a) and (d). We observe an overall similar pattern of reactivity, for example, the increase in the bulge area is similar to the RNA:RNA complex in Figure S3.

**
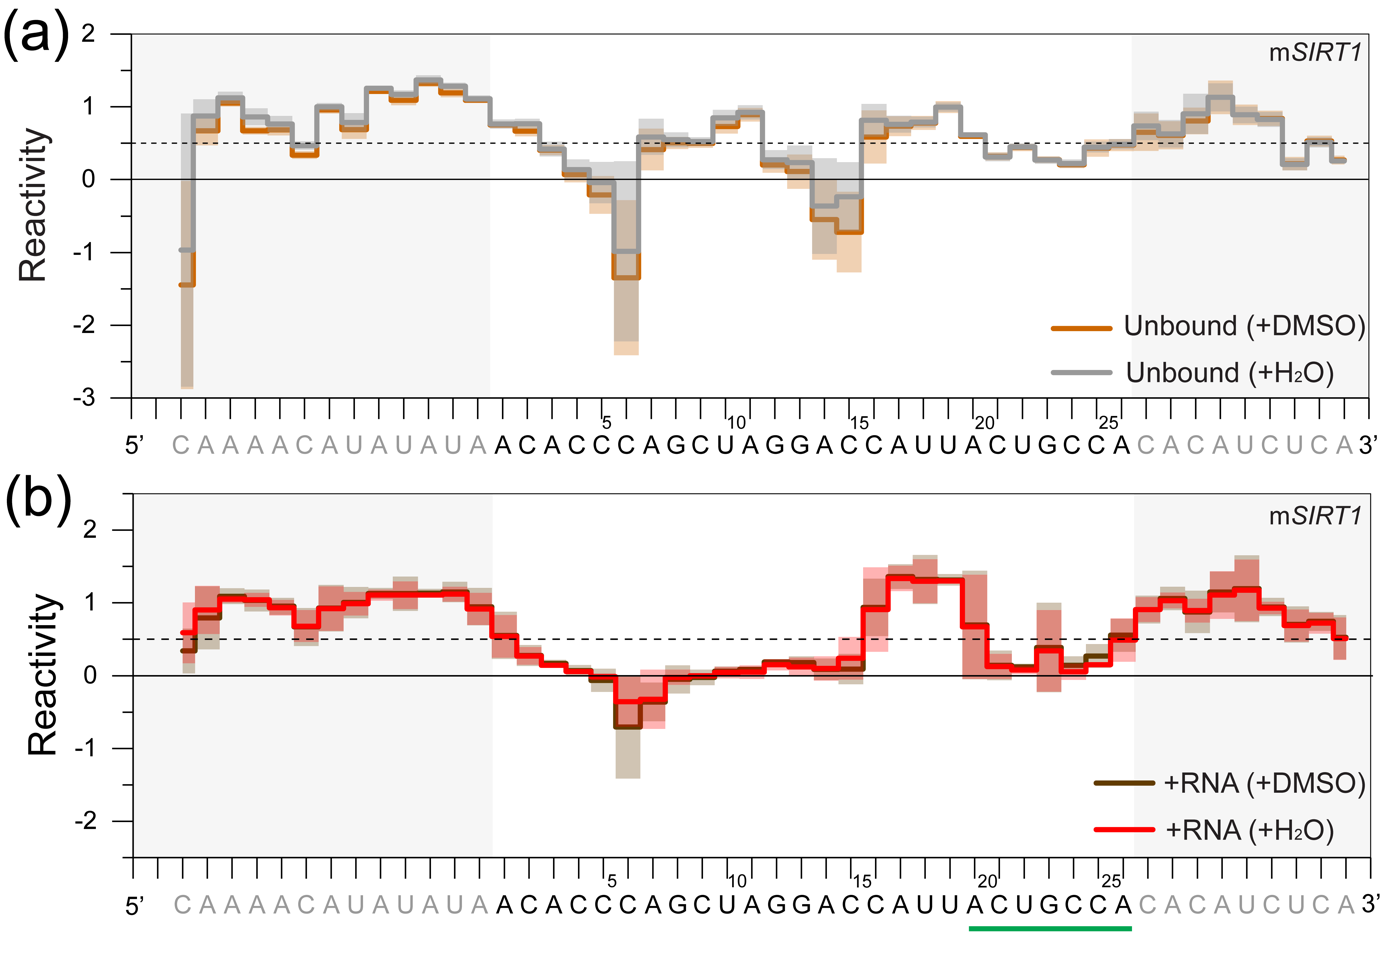
**

Figure S8. Comparison between DMSO or ddH2O in control reactions**.** In panel (a) and (b) the results of experiments with DMSO and ddH2O for unbound and RNA:RNA experiments are shown. Three independent replicates were performed and one standard deviation is indicated with shaded regions. The buffer nucleotides in the main loop (gray) and nucleotides complementary to *miR-34a* seed region (green underlining) are indicated. In both experiments, two reactions contained no-modifier (1M7) as controls and two reactions contained modifier. One of the no-modifier control reactions contained DMSO, while the other one contained ddH2O to reach the same total volume as reactions with modifier. Each experiment with modifier was baselined with one of the controls for data analysis, separately. Based on the calculated Z-factor values presented in Table S5, using ddH2O instead of DMSO in control reactions does not affect the outcomes, since the observed reactivity values are highly similar.

**
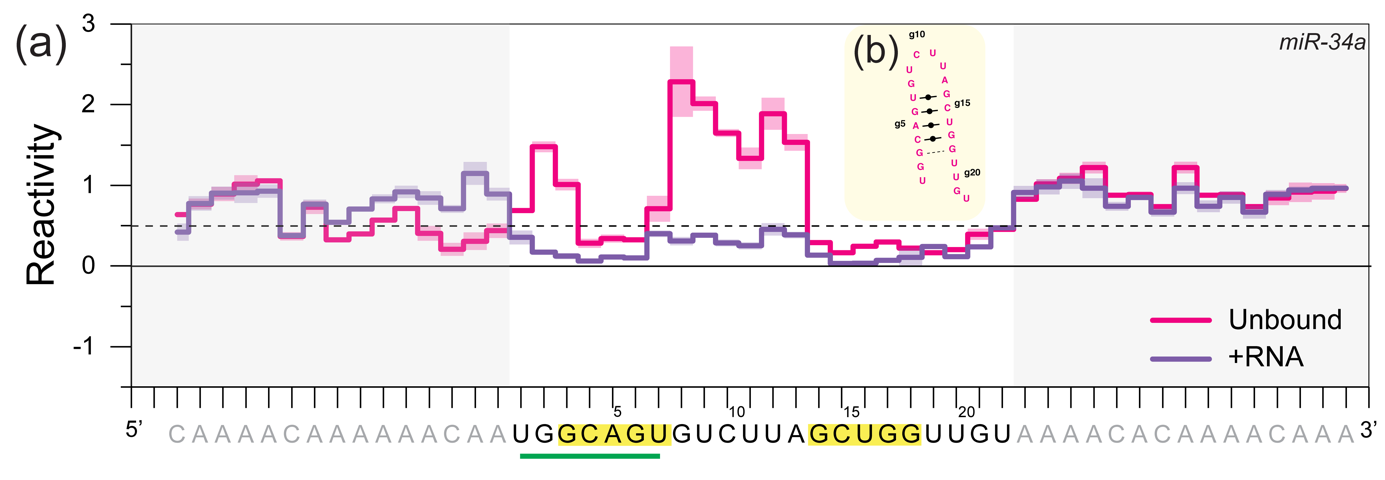
**

Figure S9. SHAPE for *miR-34a* in trans-scaffold**.** (a) Shown are reactivity values of unbound (pink) and RNA:RNA complex (purple) of the *miR-34a* sequence introduced into trans-scaffold. The buffer nucleotides of scaffold and the nucleotide in the seed region are respectively indicated with gray letters and green underlining. Panel (b) shows the secondary structure of *miR-34a* from NMR studies (Baronti *et al.*, 2020). The base-paired nucleotides based on NMR data are indicated with yellow boxes in panel (a) and correspond well to reactivity values ≤0.5, as defined in Material and methods. Calculated Z-factors between unbound and RNA:RNA are presented in Table S8.

**
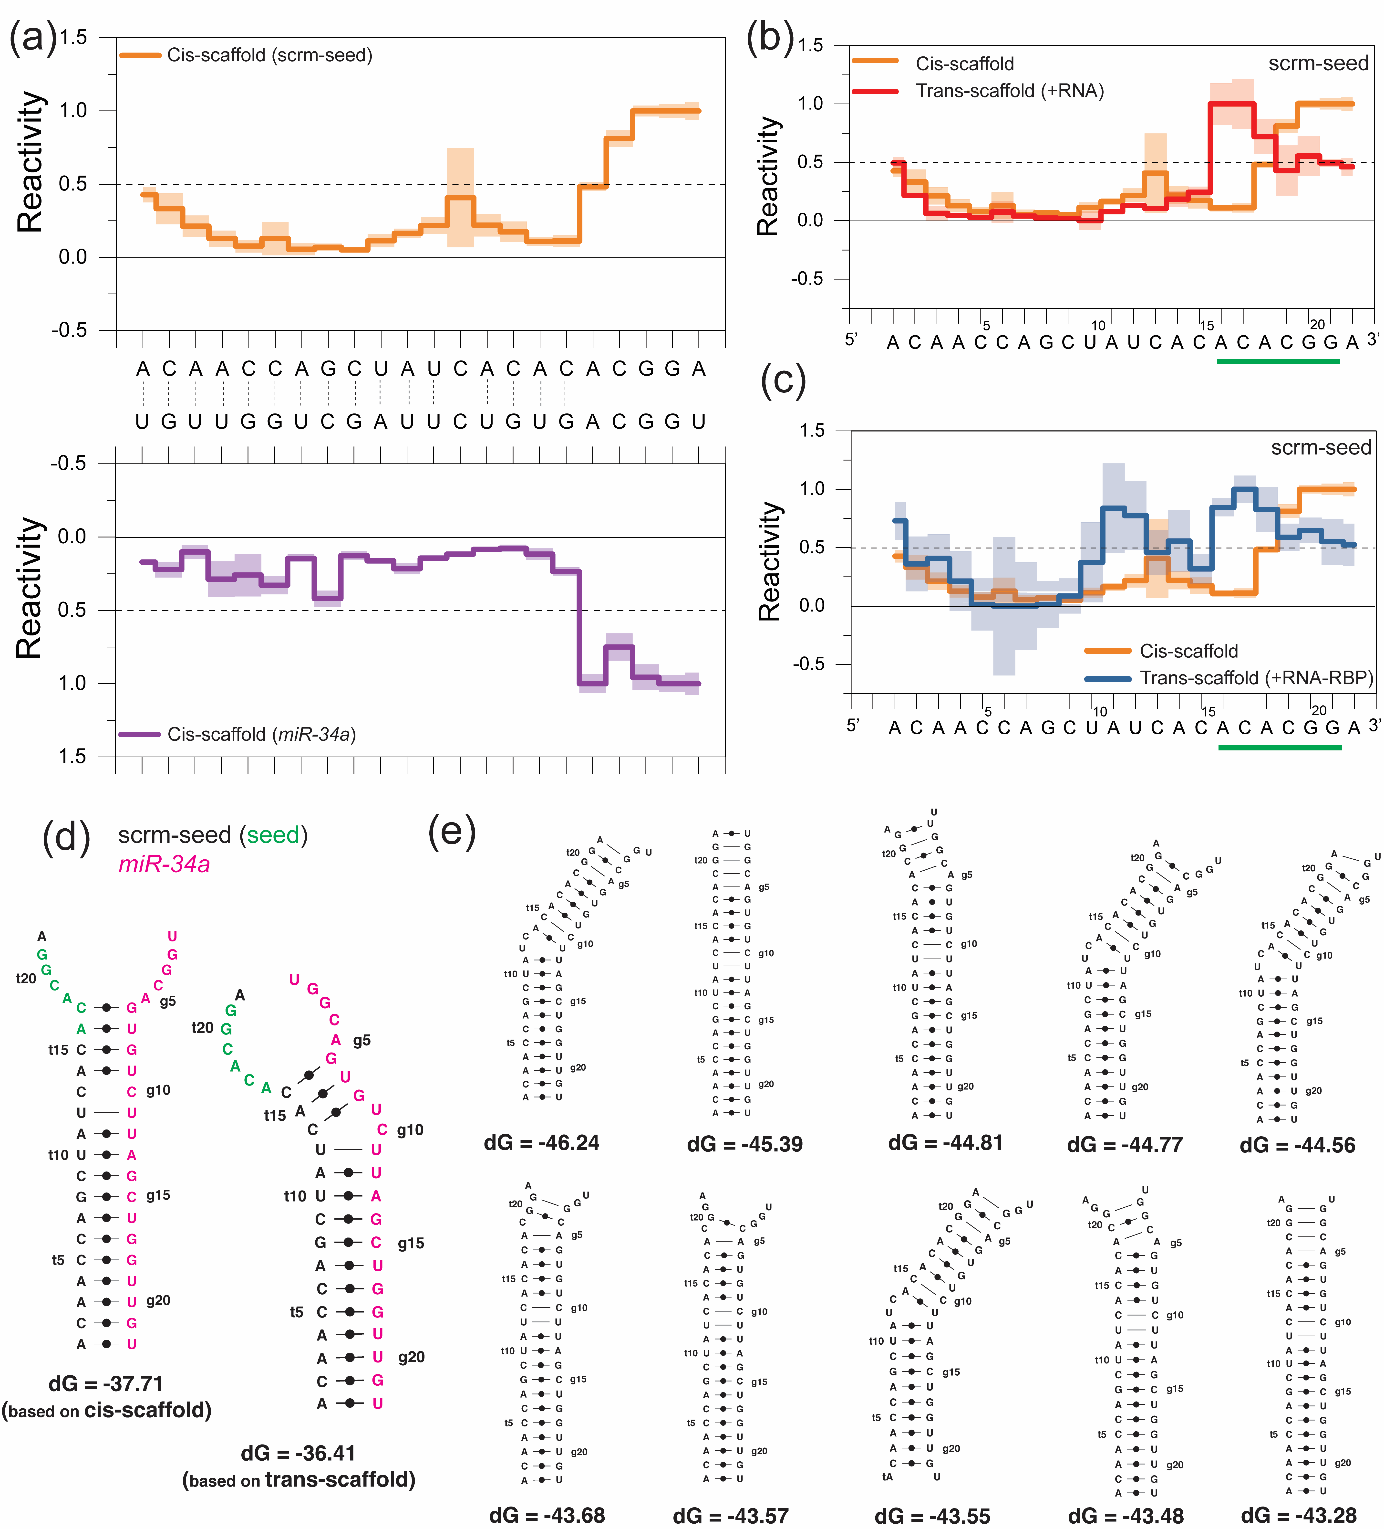
**

Figure S10. Scrm-seed in cis-scaffold with conformational switch**.** (a) shows reactivity profiles of the scrm-seed (orange) and *miR-34a* (violet) sequences in the cis-scaffold, indicating interaction in the 3’-compensatory region only, similarly as observed in trans-scaffold. (b) is direct comparison of cis- (orange) and trans-scaffolds (red) for scrm-seed:*miR-34a* read out on scrm-seed sequence. There are clear differences in binding of tA16 and tC17, which could be due to a conformational switch (d), also evident in differences in tC13, where the tC-gC mismatch changes to a bulge on the *miR-34a* side, leading to base-pairing in the 3’-end of the seed-helix. None of these conformations are binding-competent for AGO2 (c), where the low reactivity is due to baseline reactivity in the unbound scaffold (i.e. tC5 to tC9, and tC15; Figure S13a). (e) presents the ten energetically lowest predicted secondary structures by MC-Fold, indicating that different conformations are indeed accessible.

**
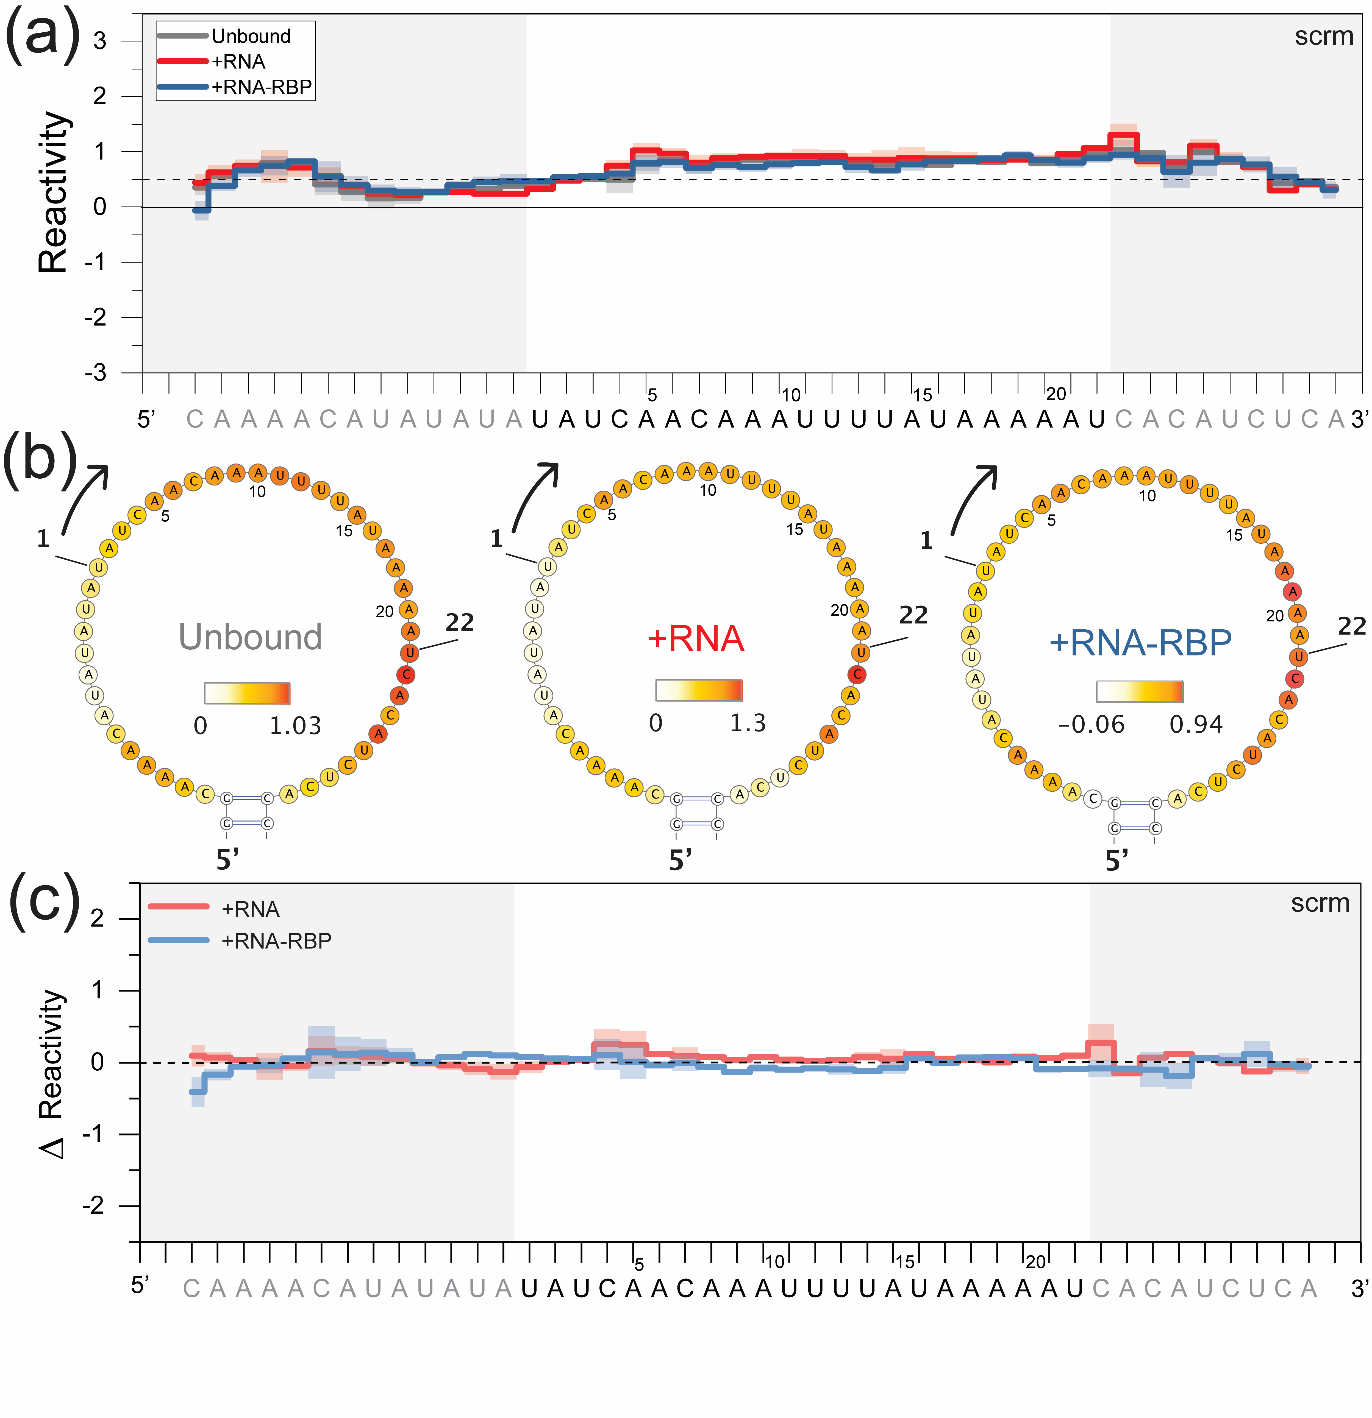
**

Figure S11. Raw data for scrambled (scrm) sequence**.** (a) Shows the observed reactivity values of unbound (gray), RNA:RNA (red), and RNA:RNA-RBP (blue) experiments, with one standard deviation value (the shaded region). In (b) the heatmap view of the data in (a) is presented. In (c) the calculated ΔReactivity values of RNA:RNA and RNA:RNA-RBP experiments are shown. The buffer nucleotides are indicated with gray box/letters.

**
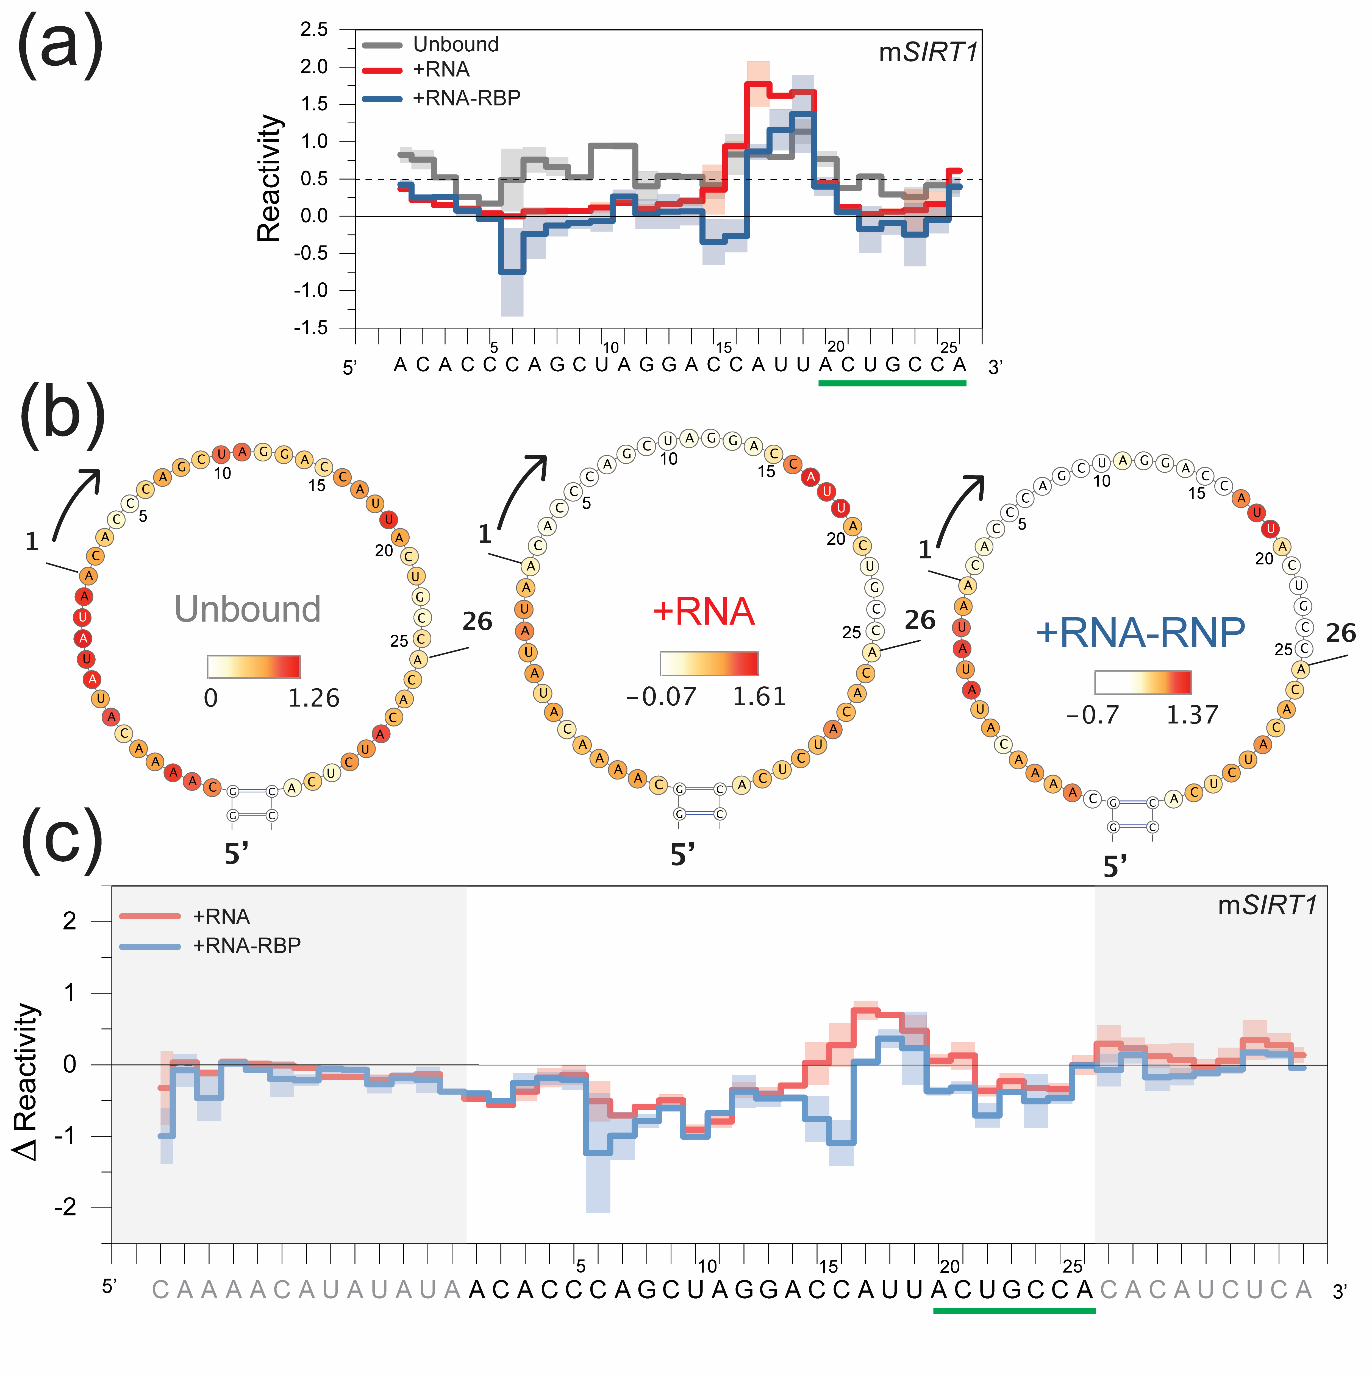
**

Figure S12. Raw data for m*SIRT1* trans-scaffold**.** (a) shows the averaged reactivity values of the three independent replicates for unbound (gray), RNA:RNA (red), and RNA:RNA-RBP experiments (blue), with one standard deviation indicated with shaded regions. The corresponding heatmaps are presented in (b). In (c) ΔReactivity values of unbound and +Ligand experiments are shown. The buffer nucleotides in the main loop indicated with gray box/letters, and the *miR-34a* seed region is indicated with green underlining.


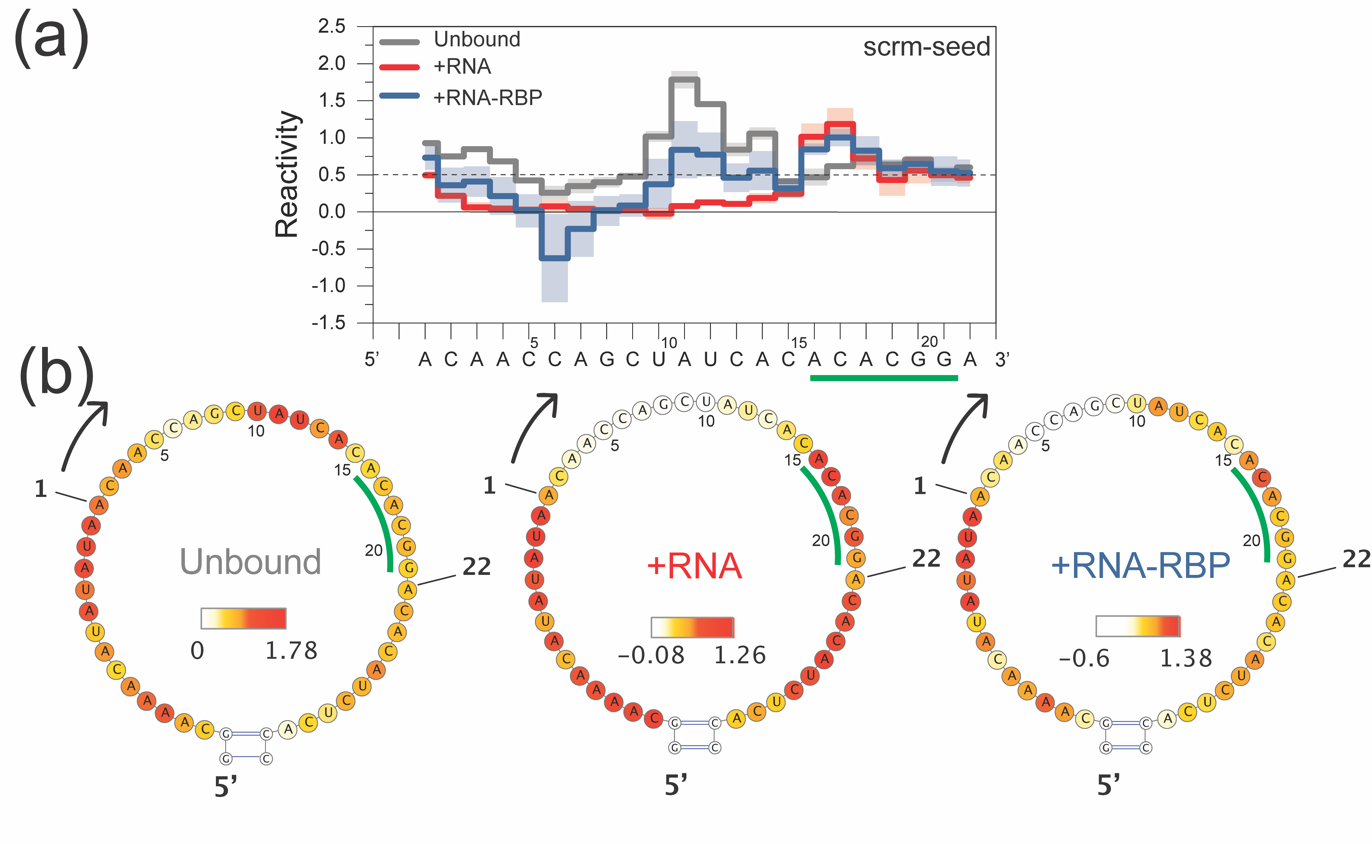


Figure S13. Raw data for scrambled seed (scrm-seed) sequence**.** (a) Shows the averaged reactivity values of unbound (gray), RNA:RNA (red), and +RNA:RNA-RBP (blue) experiments, with one standard deviation value (the shaded region). The nucleotides corresponding to the *miR-34a* seed region are indicated with green underlining. In (b) the heatmap view of averaged reactivity values for three independent replicates for the three experimental conditions are presented.

Supplementary Tables

Table S1. Overview of sequences used in this work.

| **Trans-scaffolds** | **Sequence (5’ → 3’)** |
| --- | --- |
| Buffer sequence | GGGAGAACAA |
| Reference Hairpin#1 | GCAGGGAGUACCUGC |
| Buffer sequence | AAACAACAAA |
| Buffer sequence | AAAACAAA |
| Reference Hairpin #2 | GGACGGAGUACGUCC |
| Buffer sequence | AACAAAAGAAACAACAACAACAAC |
| Main hairpin*  (Trans-Scaffold#1) | ggcgcgcgugcugccucgcgggCAAAACAUAUAUANNNNCACAUCUCAcccgcggggcugcgcgagcgcc |
| Main hairpin*  (Trans-Scaffold#2) | ggcgcgcgugcugccucgcgggCUACAUAUUCUUAUAUAANNNNAUUUUAAAcccgcggggcugcgcgagcgcc |
| Main hairpin  (9-cytosine scaffold) | ggcgcggcgcCCCCCCCCCgcgccgcgcc |
|  | |
| **Cis-scaffold** | **Sequence (5’ → 3’)** |
| Buffer sequence | GGGAGAACAA |
| Reference Hairpin#1 | GCAGGGAGUACCUGC |
| Buffer sequence | AAACAACAAA |
| Buffer sequence | AAAACAAA |
| Reference Hairpin #2 | GGACGGAGUACGUCC |
| Main hairpin** | ggcgcggcgUCAUNNNN**UUGUUCGCUU**NNNNUCUCgcgccgcgcc |
|  | |
| **Targets** | **Sequence (5’ → 3’)** |
| m*SIRT1* | ACACCCAGCUAGGACCAUUACUGCCA |
| Scrambled seed | ACAACCAGCUAUCACACACGGA |
| Scrambled | UAUCAACAAAUUUUAUAAAAAU |
| *miR-34a* | UGGCAGUGUCUUAGCUGGUUGU |
|  | |
| **Others** | **Sequence (5’ → 3’)** |
| T7 promoter | TTCTAATACGACTCACTATA |
| FAM-labeled RT primer | poly-(dA)20-FAM-GTTGTTGTTGTTGTTTCTTT |
| Poly cytosine NMR sample | GGCGCCCCCCCCCCGCGCC |

* For the trans-scaffolds, the position of target sequence in the main hairpin is indicated with underlined Ns. Also, the nucleotides of the stem part in the main hairpin are shown with lowercase.

** For the cis-scaffolds, the nucleotides of the bottom bulge and connecting loop in the main hairpin are respectively indicated with capital and red-bold letters.

Table S2. Z-factor value calculated between unbound and with *miR-34a* experiments of 1:2 and 1:5 concentration ratios (Z-factor Un vs +RNA (1:2) and Z-factor Un vs +RNA (1:5), respectively). And Z-factor value between 1:2 and 1:5 ratios (Z-factor +RNA (1:5) vs +RNA (1:2)).

| #Nucleotide | Z-factor  Un vs +RNA (1:2) | Z-factor  Un vs +RNA(1:5) | Z-factor  +RNA(1:5) vs +RNA(1:2) |
| --- | --- | --- | --- |
| tA1 | 0.59 | 0.49 | -0.88 |
| tC2 | 0.54 | 0.53 | -0.24 |
| tA3 | 0.91 | 0.92 | 0.22 |
| tC4 | 0.82 | 0.84 | -12.35 |
| tC5 | 0.64 | 0.49 | -2.42 |
| tC6 | -0.50 | -0.55 | -2.45 |
| tA7 | 0.22 | 0.55 | -1.68 |
| tG8 | 0.16 | 0.56 | -0.77 |
| tC9 | 0.69 | 0.79 | -0.33 |
| tU10 | 0.90 | 0.92 | 0.07 |
| tA11 | 0.84 | 0.86 | -0.25 |
| tG12 | -1.00 | -0.19 | -1.16 |
| tG13 | 0.27 | 0.58 | -1.42 |
| tA14 | 0.28 | 0.33 | -11.45 |
| tC15 | -7.00 | -1.21 | -2.87 |
| tC16 | -0.72 | -1.29 | -1.00 |
| tA17 | 0.55 | 0.58 | -5.26 |
| tU18 | 0.60 | 0.33 | -4.23 |
| tU19 | -4.38 | -9.26 | -2.75 |
| tA20 | 0.53 | 0.55 | -4.66 |
| tC21 | 0.71 | 0.75 | -1.08 |
| tU22 | 0.72 | 0.54 | -10.69 |
| tG23 | 0.59 | 0.69 | -11.15 |
| tC24 | -2.79 | -11.03 | -2.92 |
| tC25 | 0.26 | -0.41 | -1.85 |
| tA26 | -0.25 | 0.01 | -1.61 |

Z-factors 0, which are representing significant difference (p-value 0.05), are indicated with red numbers. The corresponding nucleotide of the seed region are indicated by green, underlined letters/numbers.

Table S3. Z-factor value calculated between unbound m*SIRT1* scaffold with (+PK) and without (-PK) proteinase K treatment.

| #Nucleotide | Z-factor  -PK vs +PK | #Nucleotide | Z-factor  -PK vs +PK |
| --- | --- | --- | --- |
| tA1 | -1.16 | tA14 | -1.52 |
| tC2 | -2.57 | tC15 | -6.77 |
| tA3 | -10.22 | tC16 | -16.63 |
| tC4 | -6.01 | tA17 | -4.74 |
| tC5 | -3.84 | tU18 | -2.78 |
| tC6 | -1.17 | tU19 | -13.93 |
| tA7 | -0.87 | tA20 | -0.49 |
| tG8 | -3.04 | tC21 | -12162.33 |
| tC9 | -1.69 | tU22 | -8.19 |
| tU10 | -0.73 | tG23 | -1.29 |
| tA11 | 0.06 | tC24 | -0.86 |
| tG12 | -1.09 | tC25 | -0.88 |
| tG13 | -0.43 | tA26 | -0.84 |

Z-factors 0, which are representing significant difference (p-value 0.05), are indicated with red numbers.

Table S4. Z-factor value calculated between unbound and with *miR-34a*-AGO2 experiments of 1:1 and 1:1.5 concentration ratios (Z-factor Un vs +RNA-RBP (1:1) and Z-factor Un vs +RNA-RBP (1:1.5), respectively). And Z-factor value between 1:1 and 1:1.5 ratios (Z-factor +RNA (1:1) vs +RNA (1:1.5)).

| #Nucleotide | Z-factor  Un vs +RNA-RBP (1:1) | Z-factor  Un vs +RNA-RBP(1:1.5) | Z-factor  +RNA-RBP(1:1) vs +RNA-RBP(1:1.5) |
| --- | --- | --- | --- |
| tA1 | -3.34 | -0.01 | 0.01 |
| tC2 | -1.45 | -0.25 | -2.75 |
| tA3 | 0.10 | -4.32 | -0.55 |
| tC4 | -1.47 | 0.52 | -16.38 |
| tC5 | 0.76 | -0.01 | 0.02 |
| tC6 | 0.49 | -0.02 | 0.54 |
| tA7 | 0.63 | 0.63 | 0.38 |
| tG8 | 0.42 | 0.50 | -19.42 |
| tC9 | 0.69 | 0.62 | -20.75 |
| tU10 | 0.90 | 0.88 | -7.78 |
| tA11 | 0.33 | 0.80 | -0.37 |
| tG12 | -2.20 | -1.41 | -1.21 |
| tG13 | 0.35 | 0.38 | -0.86 |
| tA14 | 0.75 | 0.52 | -10.61 |
| tC15 | 0.63 | 0.26 | 0.46 |
| tC16 | 0.41 | 0.29 | -1.00 |
| tA17 | -0.49 | 0.39 | -0.83 |
| tU18 | 0.65 | -2.78 | 0.40 |
| tU19 | -0.13 | 0.15 | -0.14 |
| tA20 | 0.31 | 0.44 | -0.82 |
| tC21 | 0.51 | 0.62 | -6.98 |
| tU22 | 0.79 | 0.62 | -24.48 |
| tG23 | 0.38 | 0.50 | -0.49 |
| tC24 | -0.24 | -0.52 | -6.39 |
| tC25 | 0.45 | -0.04 | -24.13 |
| tA26 | -0.13 | -0.74 | -0.48 |

Z-factors 0, which are representing significant difference (p-value 0.05), are indicated with red numbers. The corresponding nucleotide of the seed region are indicated by green, underlined letters/numbers.

Table S5. Z-factor value calculated between unbound against RNA:RNA (Z-factor Un vs +RNA) and RNA:RNA-RBP (Z-factor Un vs +RNA-RBP) for each nucleotide in scrambled (scrm) sequence.

| #Nucleotide | Z-factor  Un vs +RNA | Z-factor  Un vs +RNA-RBP | #Nucleotide | Z-factor  Un vs +RNA | Z-factor  Un vs +RNA-RBP |
| --- | --- | --- | --- | --- | --- |
| tU1 | 0.25 | 0.20 | tU12 | -33.66 | -0.13 |
| tA2 | -29.03 | -0.72 | tU13 | -15.23 | -1.31 |
| tU3 | -3.26 | -0.93 | tU14 | -2.74 | -0.17 |
| tC4 | -0.65 | -1.96 | tA15 | -9.39 | -2.55 |
| tA5 | -0.73 | -14.85 | tU16 | -1.06 | -0.21 |
| tA6 | -0.89 | -7.55 | tA17 | -10.32 | -8.35 |
| tC7 | -2.90 | -23.11 | tA18 | -8.33 | 0.32 |
| tA8 | -2.24 | -1.90 | tA19 | -3.13 | -0.43 |
| tA9 | -6.51 | -0.18 | tA20 | -0.59 | -0.47 |
| tA10 | -2.00 | -1.54 | tA21 | -1.97 | -1.14 |
| tU11 | -13.77 | -0.38 | tU22 | -0.35 | -0.83 |

Z-factors 0, which are representing significant difference (p-value 0.05), are indicated with red numbers.

Table S6. Z-factor value calculated between experimental conditions with DMSO and ddH2O in control reaction for m*SIRT1* trans-scaffold. Z-factor unbound DMSO vs ddH2O and Z-factor +RNA DMSO vs ddH2O are calculated between with DMSO and ddH2O of unbound and with *miR-34a* experiments, respectively.

| #Nucleotide | Z-factor unbound DMSO vs ddH2O | Z-factor +RNA DMSO vs ddH2O | #Nucleotide | Z-factor unbound DMSO vs ddH2O | Z-factor +RNA DMSO vs ddH2O |
| --- | --- | --- | --- | --- | --- |
| tA1 | -12.95 | -86.16 | tA14 | -11.67 | -46.06 |
| tC2 | -1.70 | -63.97 | tC15 | -3.15 | -5.66 |
| tA3 | -19.62 | -3.92 | tC16 | -4.09 | -63.17 |
| tC4 | -6.06 | -19.27 | tA17 | -16.76 | -25.12 |
| tC5 | -5.32 | -7.16 | tU18 | -25.01 | -50.64 |
| tC6 | -11.47 | -4.93 | tU19 | -222.85 | -16.05 |
| tA7 | -5.07 | -33.75 | tA20 | -4.78 | -105.10 |
| tG8 | -7.30 | -19.18 | tC21 | -40.80 | -44.53 |
| tC9 | -8.55 | -13.03 | tU22 | -15.25 | -3.65 |
| tU10 | -2.50 | -16.54 | tG23 | -25.73 | -49.39 |
| tA11 | -10.57 | -5.94 | tC24 | -11.03 | -4.08 |
| tG12 | -5.13 | -5.39 | tC25 | -27.18 | -2.22 |
| tG13 | -6.29 | -5.89 | tA26 | -25.02 | -14.39 |

Z-factors 0, which are representing significant difference (p-value 0.05), are indicated with red numbers.

Table S7. Z-factor value calculated between unbound and with *miR-34a* (Z-factor Un vs +RNA), and with *miR-34a*:AGO2 (Z-factor Un vs +RNA:RBP) experiments of m*SIRT1*.

| #Nucleotide | Z-factor  Un vs +RNA | Z-factor  Un vs +RNA:RBP | Z-factor  +RNA vs +RNA:RBP | #Nucleotide | Z-factor  Un vs +RNA | Z-factor  Un vs +RNA:RBP | Z-factor  +RNA vs +RNA:RBP |
| --- | --- | --- | --- | --- | --- | --- | --- |
| tA1 | 0.30 | 0.18 | -0.87 | tA14 | 0.03 | 0.23 | -2.97 |
| tC2 | 0.34 | 0.44 | -1.91 | tC15 | -12.21 | -0.82 | -0.89 |
| tA3 | 0.63 | 0.69 | 0.05 | tC16 | -2.49 | 0.08 | 0.55 |
| tC4 | 0.48 | 0.23 | -12.42 | tA17 | 0.61 | 0.16 | 0.22 |
| tC5 | 0.45 | 0.71 | -2.21 | tU18 | 0.40 | 0.22 | -2.05 |
| tC6 | -0.53 | -2.22 | NA | tU19 | 0.20 | -1.06 | -9.54 |
| tA7 | 0.39 | -0.04 | -9.07 | tA20 | 0.06 | -0.25 | -28.58 |
| tG8 | 0.38 | 0.36 | -4.32 | tC21 | 0.38 | 0.55 | -1.95 |
| tC9 | 0.49 | 0.65 | -3.35 | tU22 | 0.59 | 0.01 | -19.14 |
| tU10 | 0.60 | 0.76 | -3.42 | tG23 | 0.30 | -0.06 | -4.33 |
| tA11 | 0.57 | 0.66 | -1.94 | tC24 | -1.21 | -2.27 | -9.15 |
| tG12 | -0.54 | -0.67 | -5.75 | tC25 | -0.13 | 0.05 | -1.58 |
| tG13 | 0.28 | 0.04 | -4.72 | tA26 | -0.54 | -3.94 | -1.51 |

In m*SIRT1* sequence nucleotides tA1 till tC15 are corresponding to 3’-compensatory, and tA20 to tA26 (indicated by green underlined letters/numbers) to the seed region. In mSIRT1 sequence there is a flexible four-nucleotide bulge from tC16 till tU19.

Z-factors 0, which are representing significant difference (p-value 0.05), are indicated with red numbers.

Table S8. Z-factor value calculated between unbound and with m*SIRT1* (Z-factor Un vs +RNA) experiments of *miR-34a* in trans-scaffold.

| #Nucleotide | Z-factor Un vs +RNA | #Nucleotide | Z-factor Un vs +RNA |
| --- | --- | --- | --- |
| gU1 | 0.61 | gU12 | 0.76 |
| gG2 | 0.92 | gA13 | 0.75 |
| gG3 | 0.70 | gG14 | 0.09 |
| gC4 | 0.46 | gC15 | 0.40 |
| gA5 | 0.50 | gU16 | 0.78 |
| gG6 | 0.53 | gG17 | 0.80 |
| gU7 | 0.01 | gG18 | -1.78 |
| gG8 | 0.60 | gU19 | 0.16 |
| gU9 | 0.88 | gU20 | -0.14 |
| gC10 | 0.86 | gG21 | 0.09 |
| gU11 | 0.78 | gU22 | -0.41 |

Z-factors 0, which are representing significant difference (p-value 0.05), are indicated with red numbers. The nucleotides of the seed region are indicated by green underlined letters/numbers.

Table S9. Z-factor value calculated between the results of trans- and cis-scaffolds for m*SIRT1* and *miR34a* sequence.

| #Nucleotide | Z-factor Trans vs Cis | #Nucleotide | Z-factor Trans vs Cis |
| --- | --- | --- | --- |
| tA1 | -1.90 | gU1 | 0.28 |
| tC2 | -4.61 | gG2 | 0.25 |
| tA3 | -1.31 | gG3 | -0.16 |
| tC4 | 0.17 | gC4 | -0.63 |
| tC5 | -0.11 | gA5 | -0.02 |
| tC6 | -34.25 | gG6 | 0.04 |
| tA7 | -0.89 | gU7 | 0.35 |
| tG8 | -0.70 | gG8 | 0.48 |
| tC9 | -1.02 | gU9 | 0.64 |
| tU10 | -0.79 | gC10 | 0.30 |
| tA11 | 0.48 | gU11 | 0.21 |
| tG12 | -1.89 | gU12 | 0.53 |
| tG13 | 0.08 | gA13 | 0.58 |
| tA14 | -8.83 | gG14 | 0.19 |
| tC15 | -2.29 | gC15 | -1.62 |
| tC16 | 0.49 | gU16 | -2.17 |
| tA17 | -0.44 | gG17 | 0.23 |
| tU18 | 0.30 | gG18 | -17.64 |
| tU19 | -0.41 | gU19 | 0.57 |
| tA20 | -0.35 | gU20 | -0.05 |
| tC21 | -1.04 | gG21 | 0.39 |
| tU22 | -7.57 | gU22 | 0.63 |
| tG23 | -0.10 |
| tC24 | -7.01 |
| tC25 | -1.59 |
| tA26 | 0.73 |

The nucleotides of the seed region in both m*SIRT1* and *miR-34a* sequence are indicated with green underlined letter/numbers. The results of the trans-scaffolds for both sequences are from +RNA experiments. Z-factors 0, which are representing significant difference (p-value 0.05), are indicated with red numbers. The significant differences for gU7 till gA13 of *miR-34a* between cis- and trans-scaffold are possibility due to the self-folding of miR-34a, as shown in Figure S7.

Table S10. Z-factor value calculated between averaged reactivity values of scrm-seed:*miR-34a* complex from cis- and trans-scaffold.

| #Nucleotide | Z-factor Tarns vs Cis | #Nucleotide | Z-factor Tarns vs Cis |
| --- | --- | --- | --- |
| tA1 | -1.97 | tU12 | -0.45 |
| tC2 | -1.07 | tC13 | -1.31 |
| tA3 | -0.80 | tA14 | -7.32 |
| tA4 | -0.62 | tC15 | -2.25 |
| tC5 | -1.57 | tA16 | 0.55 |
| tC6 | -6.54 | tC17 | 0.53 |
| tA7 | -7.72 | tA18 | -0.46 |
| tG8 | -1.10 | tC19 | -0.40 |
| tC9 | -1.10 | tG20 | 0.51 |
| tU10 | -1.12 | tG21 | 0.84 |
| tA11 | -0.17 | tA22 | 0.77 |

Z-factors 0, which are representing significant difference (p-value 0.05), are indicated with red numbers. The nucleotides of the seed region are indicated by green underlined letters/numbers.

Table S11. Z-factor value calculated between re-normalized reactivity values of unbound against scrm-seed:*miR-34a* (Z-factor Un vs +RNA) and scrm-seed:*miR-34a*:AGO2 (Z-factor Un vs +RNA:RBP), and scrm-seed:*miR-34a* against scrm-seed:*miR-34a*:AGO2 ( Z-factor +RNA vs +RNA:RBP) for each nucleotide in scrm-seed sequence.

| #Nucleotide | Z-factor Un vs +RNA | Z-factor  Un vs +RNA:RBP | Z-factor  +RNA vs +RNA:RBP | #Nucleotide | Z-factor Un vs +RNA | Z-factor  Un vs +RNA:RBP | Z-factor  +RNA vs +RNA:RBP |
| --- | --- | --- | --- | --- | --- | --- | --- |
| tA1 | 0.78 | -0.47 | -0.38 | tU12 | 0.95 | 0.25 | 0.32 |
| tC2 | 0.86 | -0.06 | -1.63 | tC13 | 0.78 | -0.15 | 0.13 |
| tA3 | 0.83 | 0.20 | -0.13 | tA14 | 0.74 | -0.06 | -0.31 |
| tA4 | 0.91 | 0.09 | -1.31 | tC15 | 0.44 | -1.44 | -2.74 |
| tC5 | 0.92 | 0.18 | -21.35 | tA16 | 0.28 | 0.30 | -0.92 |
| tC6 | -0.50 | -0.13 | -0.41 | tC17 | 0.41 | 0.46 | -1.28 |
| tA7 | 0.43 | -0.21 | -1.10 | tA18 | -7.32 | -2.11 | -4.40 |
| tG8 | 0.63 | -0.04 | -32.20 | tC19 | -1.18 | -7.10 | -2.22 |
| tC9 | 0.78 | 0.24 | -2.73 | tG20 | -1.34 | -4.12 | -4.07 |
| tU10 | 0.78 | 0.02 | -0.52 | tG21 | -14.76 | -6.70 | -6.61 |
| tA11 | 0.88 | 0.19 | 0.23 | tA22 | -0.09 | -3.85 | -6.19 |

Z-factors 0, which are representing significant difference (p-value 0.05), are indicated with red numbers. The nucleotides of the seed region are indicated by green underlined letters/numbers.

# Reference

Baronti, L. *et al.* (2020) ‘Base-pair conformational switch modulates miR-34a targeting of Sirt1 mRNA’, *Nature*, 583(7814), pp. 139–144. doi: 10.1038/s41586-020-2336-3.

Clay, M. C. *et al.* (2017) ‘Resolving sugar puckers in RNA excited states exposes slow modes of repuckering dynamics.’, *Nucleic acids research*, 45(14), p. e134. doi: 10.1093/nar/gkx525.

Parisien, M. and Major, F. (2008) ‘The MC-Fold and MC-Sym pipeline infers RNA structure from sequence data.’, *Nature*, 452(7183), pp. 51–55. doi: 10.1038/nature06684.

Schanda, P. and Brutscher, B. (2005) ‘Very fast two-dimensional NMR spectroscopy for real-time investigation of dynamic events in proteins on the time scale of seconds.’, *Journal of the American Chemical Society*, 127(22), pp. 8014–8015. doi: 10.1021/ja051306e.

Schlagnitweit, J. *et al.* (2018) ‘Efficient Detection of Structure and Dynamics in Unlabeled RNAs: The SELOPE Approach.’, *Chemistry (Weinheim an der Bergstrasse, Germany)*, 24(23), pp. 6067–6070. doi: 10.1002/chem.201800992.

Vuister, G. W. and Bax, A. (1992) ‘Resolution enhancement and spectral editing of uniformly 13C-enriched proteins by homonuclear broadband 13C decoupling’, *Journal of Magnetic Resonance (1969)*, 98(2), pp. 428–435. doi: https://doi.org/10.1016/0022-2364(92)90144-V.
